# Supplementary material
Source: publisher figshare collection journal article supplement (https://acs.figshare.com/ndownloader/files/4579822)
Supplement: Supplementary file 1 [file 4579822]

### Crystal structure of $\text{Cu}_3\text{Mo}_2\text{O}_9$

$\text{Cu}_3\text{Mo}_2\text{O}_9$  has an orthorhombic structure which can be described by a space group  $Pnma$  with lattice constants of  $a=7.667 \text{ \AA}$ ,  $b=6.862 \text{ \AA}$ , and  $c=14.6 \text{ \AA}$ . There are four molecules in one unit cell, as shown in Figure S1. In this structure, there are three Cu sites labeled by  $\text{Cu}_1$ ,  $\text{Cu}_2$ ,  $\text{Cu}_3$ , seven O sites by  $\text{O}_1$ - $\text{O}_7$ , and two Mo sites by  $\text{Mo}_1$ ,  $\text{Mo}_2$ . Also, included in this structure are two sorts of almost regular  $\text{Mo}_1$ -4O and  $\text{Mo}_2$ -4O tetrahedra, one sort of compressed  $\text{Cu}_1$ -6O octahedra, one sort of  $\text{Cu}_2$ -5O polyhedra, and one sort of  $\text{Cu}_3$ -5O polyhedra. A  $\text{Cu}_2$ -5O polyhedron can be taken as a pentahedron in which one Cu atom and four O atoms ( $\text{O}_1$ ,  $\text{O}_2$  and  $2\text{O}_5$ ) are nearly coplanar. However, in the case of  $\text{Cu}_3$ , a sixth O atom is situated at a distance of  $\sim 2.56 \text{ \AA}$ . Thus,  $\text{Cu}_3$ -6O can also be regarded as a distorted octahedron. For this crystal structure an interesting feature is the unusual compressed  $\text{Cu}_1$ -6O octahedral environment round the Jahn-Teller active ion  $\text{Cu}^{2+}$ . The  $\text{Cu}_1$ -6O compressed octahedra are connected by corners to form strings running along the  $[010]$  direction.  $\text{Cu}_2$ -5O and  $\text{Cu}_3$ -6O polyhedra are linked to the  $\text{Cu}_1$ -6O octahedra of a string by edge sharing whereas the Mo-4O tetrahedra are linked to them by corner sharing, as Figure S1 shows. The  $\text{Cu}_1$ - $\text{O}_1$  bonds along the  $[010]$  direction are the shortest among all Cu-O bonds, suggesting the compression of  $\text{Cu}_1$ -6O octahedra along this direction.

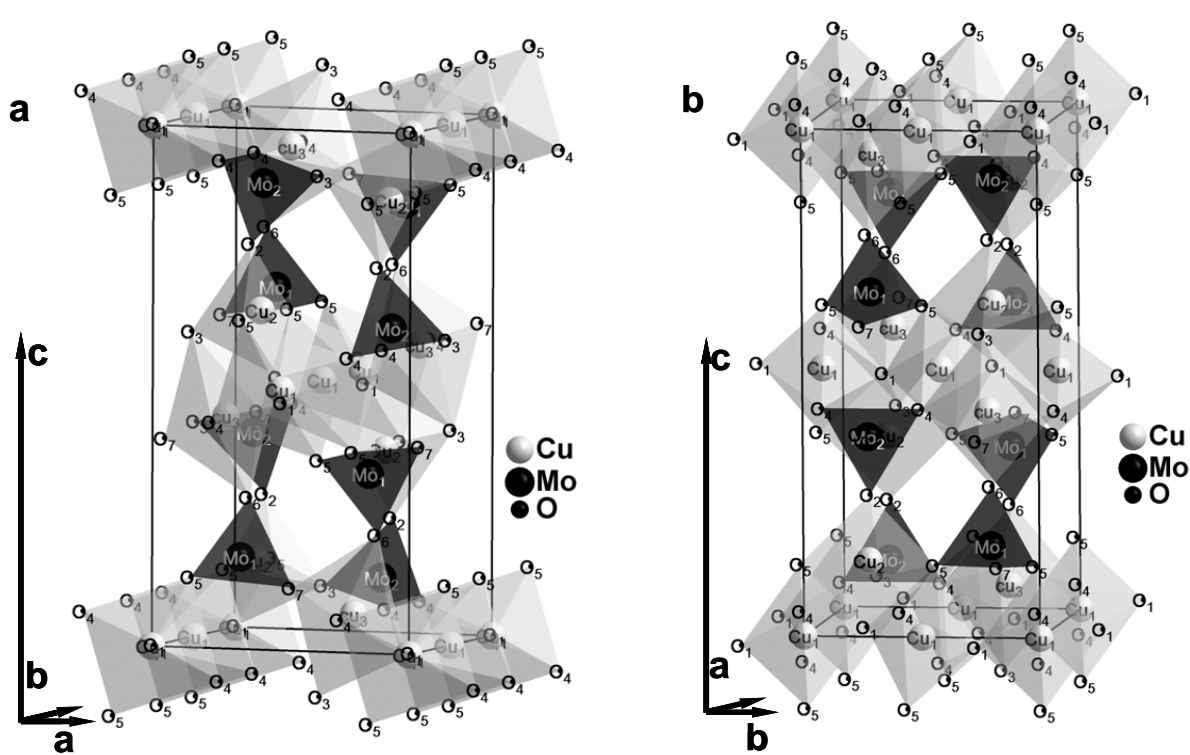

Figure S1 Schematic illustrations of a  $\text{Cu}_3\text{Mo}_2\text{O}_9$  unit cell. Noting two sorts of Mo1,2-4O tetrahedra, one sort of compressed Cu1-6O octahedra forming strings running along *b*, one sort of Cu2-5O pentahedra in which a Cu atom and four O atoms are nearly coplanar, and one sort of Cu3-6O distorted octahedra.
